# Supplementary material for: Entamoeba histolytica Induce Signaling via Raf/MEK/ERK for Neutrophil Extracellular Trap (NET) Formation
Source: PubMed Central journal article supplement (PMC6039748; doi:10.3389/fcimb.2018.00226), 2018-07-04
Supplement: Image_1.pdf [file Image_1.pdf]

## *Supplementary Material*

### ***Entamoeba histolytica* induce signaling via Raf/MEK/ERK for neutrophil extracellular trap (NET) formation**

**Zayda Fonseca<sup>1</sup>, César Díaz-Godínez<sup>1</sup>, Nancy Mora<sup>1</sup>, Omar Rafael Alemán<sup>1</sup>, Eileen Uribe-Querol<sup>2</sup>, Julio C. Carrero<sup>1\*</sup>, Carlos Rosales<sup>1\*</sup>**

<sup>1</sup> Departamento de Inmunología, Instituto de Investigaciones Biomédicas, Universidad Nacional Autónoma de México, Mexico City, Mexico

<sup>2</sup> División de Estudios de Posgrado e Investigación, Facultad de Odontología, Universidad Nacional Autónoma de México, Mexico City, Mexico

**\* Correspondence:**

Dr. Julio César Carrero

[carrero@unam.mx](mailto:carrero@unam.mx)

Dr. Carlos Rosales

[carosal@unam.mx](mailto:carosal@unam.mx)

#### **1 Supplementary Figures**

## 1.1 Supplementary Figures

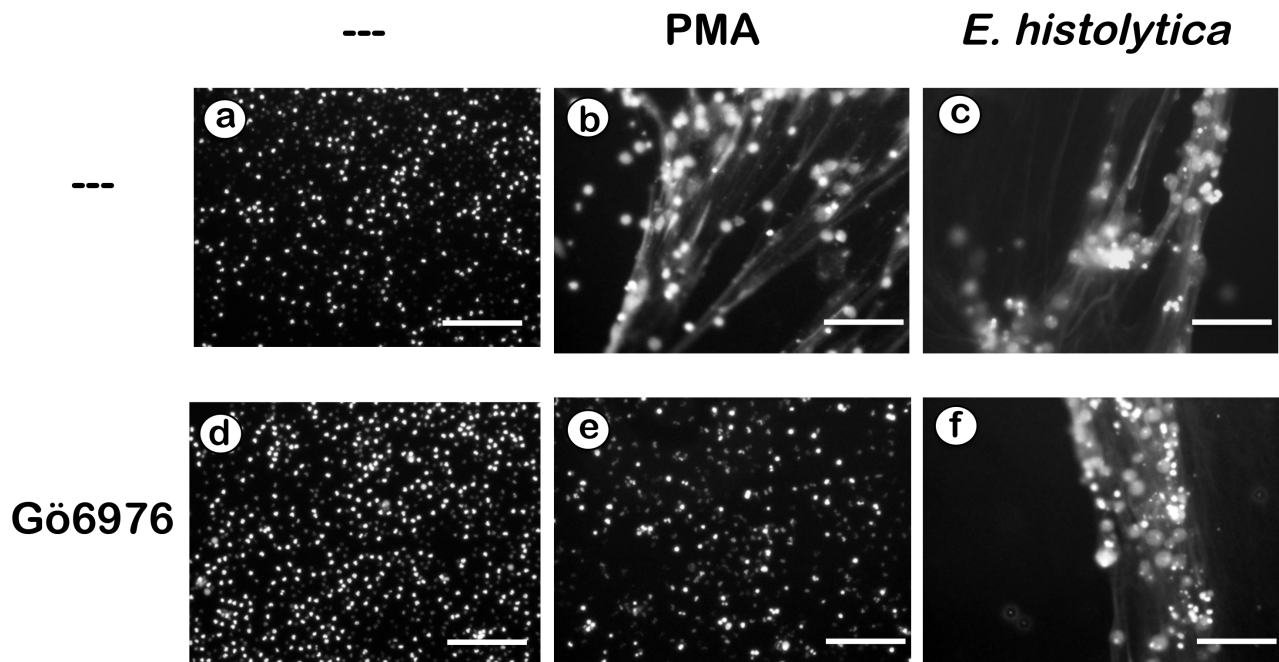

**Supplementary Figure 1.** *Entamoeba histolytica*-induced NET formation is independent on PKC. Human neutrophils were left untreated (---), stimulated with 20 nM phorbol 12-myristate 13-acetate (PMA), or with *E. histolytica* trophozoites. Neutrophils were previously treated with solvent alone (---; panels a, b, c) or with the PKC inhibitor Gö6976 (1  $\mu$ M) (panels d, e, f). After 4 h, PMN neutrophils fixed and stained for DNA (DAPI). Microphotographs were taken at 200 X magnification and are representative of three experiments. Bar is 100  $\mu$ m.
