# Supplementary material for: Entamoeba histolytica Induce Signaling via Raf/MEK/ERK for Neutrophil Extracellular Trap (NET) Formation
Source: PubMed Central journal article supplement (PMC6039748; doi:10.3389/fcimb.2018.00226), 2018-07-04
Supplement: Image_3.pdf [file Image_3.pdf]

## 1.3 Supplementary Figures

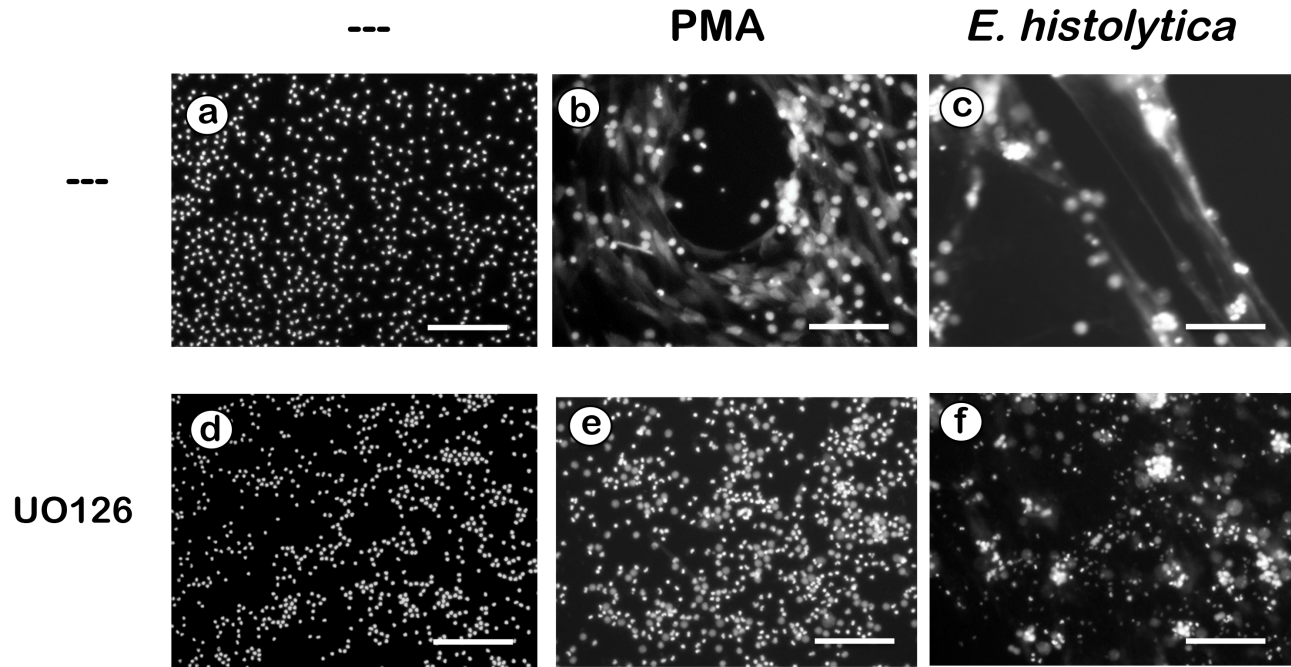

**Supplementary Figure 3.** *Entamoeba histolytica*-induced NET formation is dependent on MEK. Human neutrophils were left untreated (---), stimulated with 20 nM phorbol 12-myristate 13-acetate (PMA), or with *E. histolytica* trophozoites. Neutrophils were previously treated with solvent alone (---; panels a, b, c) or with the MEK inhibitor UO126 (75  $\mu$ M) (panels d, e, f). After 4 h, neutrophils were fixed and stained for DNA (DAPI). Microphotographs were taken at 200 X magnification and are representative of three experiments. Bar is 100  $\mu$ m.
