# Supplementary material for: Entamoeba histolytica Induce Signaling via Raf/MEK/ERK for Neutrophil Extracellular Trap (NET) Formation
Source: PubMed Central journal article supplement (PMC6039748; doi:10.3389/fcimb.2018.00226), 2018-07-04
Supplement: Image_5.pdf [file Image_5.pdf]

1.5 Supplementary Figures

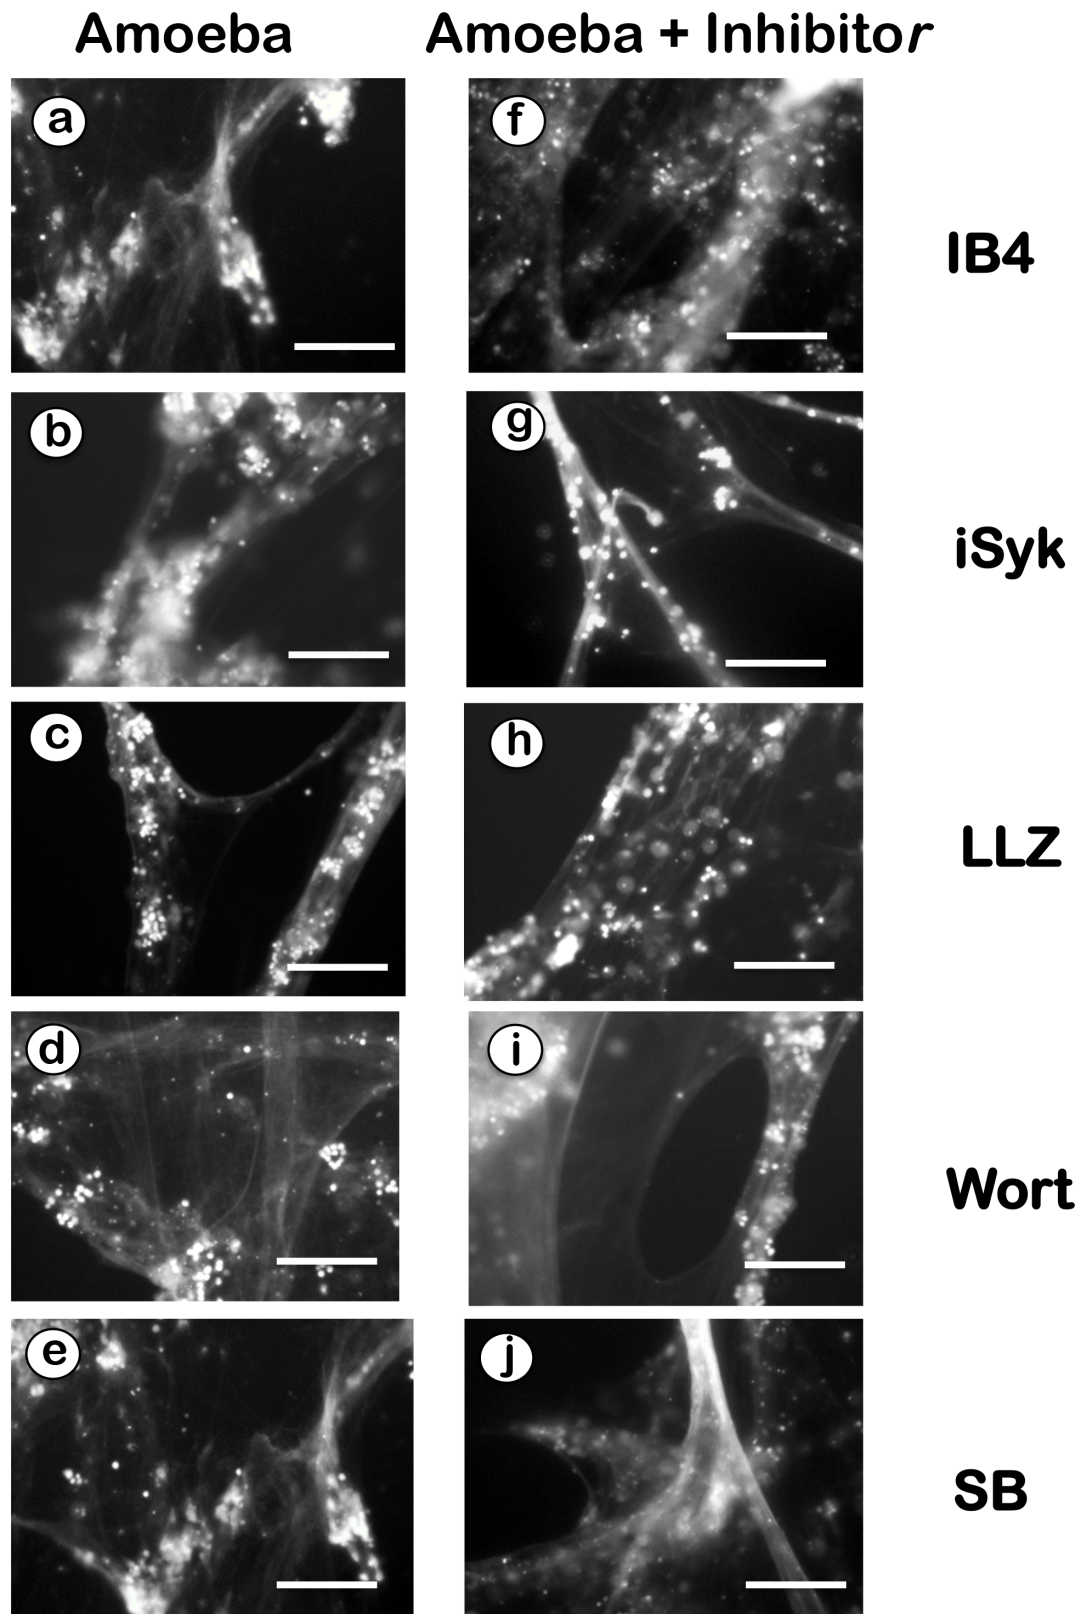

**Supplementary Figure 5.** *Entamoeba histolytica*-induced NET formation is independent on Syk, TAK1,  $\beta$ 2 integrins, PI3K, and p38 MAPK. Human neutrophils were stimulated with *E. histolytica* trophozoites alone (Amoeba) or in the presence of the inhibitors (Amoeba + Inhibitor): 10  $\mu$ g/ml of the blocking monoclonal antibody anti- $\beta$ 2 integrins (IB4), 1  $\mu$ M iSyk, a Syk inhibitor, 10 nM LLZ 1640-2 (LLZ), a TAK1 inhibitor, 50 nM Wortmannin (Wort), a PI3K inhibitor, or 200 nM SB203580 (SB), a p38 MAPK inhibitor. After 4 h, cells were fixed and stained for DNA (DAPI). Microphotographs were taken at 200 X magnification and are representative of three experiments. Bar is 100  $\mu$ m.
